# Supplementary material
Source: PubMed Central journal article supplement (PMC2596658)
Supplement: NIHMS72685-supplement.pdf [file NIHMS72685-supplement.pdf]

| Exposure        | Agent(s): Duration                             | number of patients (n=9) |
|-----------------|------------------------------------------------|--------------------------|
| Single Agent    | cimetidine: 2-3 yrs                            | 1                        |
|                 | cimetidine: 3-4 yrs                            | 1                        |
|                 | cimetidine: 4-5 yrs                            | 1                        |
|                 | doxepin: < 1 year                              | 1                        |
|                 | fluoxetine: unknown                            | 1                        |
|                 | fluoxetine: 3-4 yrs                            | 1                        |
|                 | paroxetine: 4-5 yrs                            | 1                        |
| Multiple Agents | paroxetine: < 1 year & cimetidine: 1-2 years   | 1                        |
|                 | fluoxetine: 4-5 years & haloperidol: 4-5 years | 1                        |

Supplementary Table 1: Type of CYP2D6 drug co-administered with tamoxifen, and the duration of exposure for each drug(s).
